# Supplementary material for: Peptides from the Sea Anemone Metridium senile with Modified Inhibitor Cystine Knot (ICK) Fold Inhibit Nicotinic Acetylcholine Receptors
Source: MDPI journal article supplement (doi:10.3390/toxins15010028), 2022-12-30
Supplement: s1 [file s1]

**Table S1.** MALDI-TOF characterization of novel nAChR-targeting toxins purified from *Metridium senile* venom and their established N-terminal sequences (cysteine residues are shown with bold).

| Peptide name                                                  | Average MW measured by MALDI-TOF (Da) | Calculated average MW of the respective predicted target peptides deduced from cDNAs after proposed posttranslational modifications (Da) | N-terminal sequence established by Edman degradation                    |
|---------------------------------------------------------------|---------------------------------------|------------------------------------------------------------------------------------------------------------------------------------------|-------------------------------------------------------------------------|
| <b><math>\alpha</math>-AnmTX-Ms11a-1</b> (short name Ms11a-1) | 4594.8                                | 4594.38                                                                                                                                  | G <b>C</b> KKLNSN <b>C</b> TRQYRE <b>C</b> CHGLV <b>C</b> RRPNYGNRGILWR |
| <b><math>\alpha</math>-AnmTX-Ms11a-2</b> (Ms11a-2)            | 4653.4                                | 4653.41                                                                                                                                  | G <b>C</b> KNLNSH <b>C</b> YRQHRE <b>C</b> CHGLV <b>C</b> R             |
| <b><math>\alpha</math>-AnmTX-Ms11a-3</b> (Ms11a-3)            | 4918.4                                | 4918.82                                                                                                                                  | G <b>C</b> KKLNSY <b>C</b> TRQHRE <b>C</b> CHGLV <b>C</b> RRPDYGIG      |
| <b><math>\alpha</math>-AnmTX-Ms11a-4</b> (Ms11a-4)            | 3274.8                                | 3274.79                                                                                                                                  | <b>C</b> AQTGGT <b>C</b> SKSKD <b>C</b> CIVTAI <b>C</b> STA             |

(a) Ms11a-1

DNA: gattcgggtgtgaacatcaccaagatagcaacgtttcaagcttcacactcaaccgaactg

+1fr: ·D·S·G·V·N·I·T·K·I·A·T·F·Q·A·S·H·S·T·E·L·

DNA: gatattacactcaaccgaactggatattactattataagggattcgaa**atg**gcttcaaag

+1fr: ·D·I·T·L·N·R·T·G·Y·Y·Y·Y·K·G·F·E·M·A·S·K·

DNA: attttctttgtccttgcagtgtttcttgtgatgtcggctgtgctccccgaatctttcgcg

+1fr: ·I·F·F·V·L·A·V·F·L·V·M·S·A·V·L·P·E·S·F·A·

DNA: ggctgcaagaaattgaattcgaattgttcgagacaataaccgtgagtgttgcatgggtttg

+1fr: ·G·C·K·K·L·N·S·N·C·S·R·Q·Y·R·E·C·C·H·G·L·

DNA: gtgtgcagaaggcctaactatggcaatggcagaggattctttggagatgtgtcaaggcc

+1fr: ·V·C·R·R·P·N·Y·G·N·G·R·G·I·L·W·R·C·V·K·A·

DNA: aagaagtgaatggatgcttataataaaggataagctcttcattggttaagaataataacta

+1fr: **K**·**K**·\*·M·D·A·Y·N·K·G·\*·A·L·H·W·L·R·I·I·L·

DNA: atactaataactaatgtttttcaggagggttgctctaaagaactaaaattcaaactgtatta

+1fr: ·I··L··I··L··M··F··F··R··R··L··L··\*··R··T··K··I··Q··T··V··L·

DNA: acactgtaattcaaaaagggaaataaactatcatagttgattcaaaaaaaaaaaaaaaaaaaaaa

+1fr: ·T··L··\*··F··K··K··E··I··N··Y··H··S··\*··F··K··K··K··K··K··K·

(b) Ms11a-4

DNA: agatacaagtgaacattgaagtcgttcttgcaagtgaaatctctcgagcttgataacc**atg**

+1fr: ·R··Y··K··\*··T··L··K··S··F··L··Q··V··N··L··S··S··L··I··T··M·

DNA: aaggtccttggtgcagtccttgctcttctgctctactgatgtgtatgtttgttgacatcgcg

+1fr: ·K··V··L··V··A··V··L··V··F··A··L··L··M··C··M··F··V··D··I··A·

DNA: gaaagtcgtcgtcgagacaaccagaataccccagtgggcttcgatatgacgaggagatg

+1fr: E · S · R · R · R · D · N · P · E · Y · P · S · G · L · R · Y · D · E · E · M ·

DNA: ggtgttttcaaacggtgcgctcaaacgggagggacatgctccaaatctaaagattgctgt

+1fr: ·G··V··F··K··R··C··A··Q··T··G··G··T··C··S··K··S··K··D··C··C·

DNA: attgtaacagctatctgcagtacagcaacaagtcctaaaacatgtttttatggctagtga

+1fr: ·I·V·T·A·I·C·S·T·A·T·S·P·K·T·C·F·Y·G·\*·\*·\*·

```

DNA:  aagagcgggaatatagtgtgtgcatgcagatTTTacaattgaagatgtctttcacttagc
+1fr:  ·K·S·G·N·I·V·C·A·C·R·F·Y·N·*·R·C·L·S·L·S·

DNA:  tggaatcatgtaaaataaaaccactctttgcttgtaatggtgatcaggattattataata
+1fr:  ·W·N·H·V·K·*·N·H·S·L·L·V·M·V·I·R·I·I·I·I·

DNA:  aaacatgtaatggtgtcga
+1fr:  ·K·H·V·M·V·S·

```

**Figure S1. Structural organization of precursor proteins.** (a) nucleotide sequence of *ms11.1* cDNA accompanied by deduced amino acid sequence. (b) nucleotide sequence of *ms11.4* cDNA accompanied by deduced amino acid sequence. The signal peptide sequences are *underlined*, determined mature peptide sequences are bold and highlighted gray, and the propeptide sequences are shown in italics.

**Table S2.** 3D-alignment of Ms11a-3 with proteins in PDB database.

| No                                                                                                                                                                           | PDB ID<br>(Ref.)                                                                   | Name       | Q-score<br>(RMSD) | N <sub>align</sub><br>(N <sub>alt</sub> ) | Source<br>organism            | Target (that was in the corre-<br>sponding Ref.)                                                                                                                                                                                                                                | No (or weak) effect                                                |
|------------------------------------------------------------------------------------------------------------------------------------------------------------------------------|------------------------------------------------------------------------------------|------------|-------------------|-------------------------------------------|-------------------------------|---------------------------------------------------------------------------------------------------------------------------------------------------------------------------------------------------------------------------------------------------------------------------------|--------------------------------------------------------------------|
| 1                                                                                                                                                                            | 2MXM<br>(doi.org/10.1124/mol.115.098178)                                           | TRTX-Tp1a  | 0.66<br>(1.07Å)   | 32(33)                                    | <i>Thrixopelma pruriens</i>   | hNa <sub>v</sub> 1.1 (IC <sub>50</sub> 101±30 nM);<br>hNa <sub>v</sub> 1.3 (IC <sub>50</sub> 1.3±4.7 nM);<br>hNa <sub>v</sub> 1.5 (IC <sub>50</sub> >500 nM);<br>hNa <sub>v</sub> 1.7 (IC <sub>50</sub> 2.1±1.3 nM)                                                             | human voltage-gated<br>calcium channels (5<br>μM);<br>nAChR (5 μM) |
| <div> <div>10203040</div> <div>Ms11a-3:GCKKLNSYCTRNHRECHGLVCR-RPDYGIGRGILWKCTRARK</div> <div>2MXM :DCLKFGWKCNPRNDKCCSGLKCGSNH-----NWCKLHL-</div> <div>102030</div> </div>    |                                                                                    |            |                   |                                           |                               |                                                                                                                                                                                                                                                                                 |                                                                    |
| 2                                                                                                                                                                            | 2MQF<br>(doi.org/10.1016/S0014-5793(03)01303-6;<br>doi.org/10.1124/mol.115.100784) | TRTX-HHN2B | 0.64<br>(1.06Å)   | 32(34)                                    | <i>Haplopetelma hainanum</i>  | para/tipE (IC <sub>50</sub> 4.3±0.3 μM)<br>rNa <sub>v</sub> 1.2/β <sub>1</sub><br>(IC <sub>50</sub> 68±6 μM)                                                                                                                                                                    |                                                                    |
| <div> <div>10203040</div> <div>Ms11a-3:-GCKKLNSYCTRNHRECHGLVCR-RPDYGIGRGILWKCTRARK</div> <div>2MQF :AECCKGFGKSCVPGKNECCSGYACNSRD-----KWCKVLL-</div> <div>102030</div> </div> |                                                                                    |            |                   |                                           |                               |                                                                                                                                                                                                                                                                                 |                                                                    |
| 3                                                                                                                                                                            | 6BR0<br>(doi.org/10.1074/jbc.RA118.002553)                                         | CCOTX-I    | 0.63<br>(1.26Å)   | 32(33)                                    | <i>Ceratogyrus marshalli</i>  | hNa <sub>v</sub> 1.2 (EC <sub>50</sub> 6.1±0.7 nM);<br>hNa <sub>v</sub> 1.4 (EC <sub>50</sub> 263±45 nM);<br>hNa <sub>v</sub> 1.5 (EC <sub>50</sub> 188±20 nM);<br>hNa <sub>v</sub> 1.6 (EC <sub>50</sub> 40.6±5.8 nM);<br>hNa <sub>v</sub> 1.7 (IC <sub>50</sub> 129.1±6.5 nM) |                                                                    |
| <div> <div>10203040</div> <div>Ms11a-3:GCKKLNSYCTRNHRECHGLVCR-RPDYGIGRGILWKCTRARK</div> <div>6BR0 :DCLGWFKSCDPKNDKCKKNYTCSRDR-----RWCKYDL-</div> <div>102030</div> </div>    |                                                                                    |            |                   |                                           |                               |                                                                                                                                                                                                                                                                                 |                                                                    |
| 4                                                                                                                                                                            | 1MB6<br>(doi.org/10.1074/jbc.M204063200)                                           | HWTX-IV    | 0.59<br>(0.95Å)   | 31(35)                                    | <i>Haplopetelma schmidtii</i> | neuronal tetrodotoxin-sensi-<br>tive voltage-gated sodium<br>channel<br>of adult rat dorsal root gan-<br>glion neurons (IC <sub>50</sub> 30 nM)                                                                                                                                 | tetrodotoxin-resistant<br>voltage-gated sodium<br>channel          |

|                                                                                                                                                                                                                                                      |                                       |           |                 |        |                                |                                                                                                                                                                                                                                                                                                                                     |                                                                                     |
|------------------------------------------------------------------------------------------------------------------------------------------------------------------------------------------------------------------------------------------------------|---------------------------------------|-----------|-----------------|--------|--------------------------------|-------------------------------------------------------------------------------------------------------------------------------------------------------------------------------------------------------------------------------------------------------------------------------------------------------------------------------------|-------------------------------------------------------------------------------------|
| <div> <div>10203040</div> <div>Ms11a-3:GCKKLNSYCTRNRHRE<b>CCH</b>--GL<b>V</b>CRRPDYGIGRGILWK<b>C</b>TRARK</div> <div>1MB6 :E<b>C</b>LEIFK<b>A</b>CNPSNDN<b>CCK</b>SSK<b>LVC</b>SRK-----TRW<b>C</b>KYNI-</div> <div>102030</div> </div>               |                                       |           |                 |        |                                |                                                                                                                                                                                                                                                                                                                                     |                                                                                     |
| 5                                                                                                                                                                                                                                                    | 2MPQ<br>(doi.org/10.1111/bph.13081)   | TRTX-Hd1a | 0.59<br>(1.13Å) | 32(36) | <i>Haplopelma doriae</i>       | hNav, especially hNav1.1 and hNav1.7                                                                                                                                                                                                                                                                                                |                                                                                     |
| <div> <div>10203040</div> <div>Ms11a-3:-GCKKLNSYCTRNRHRE<b>CCH</b>--GL<b>V</b>CR-RPDYGIGRGILWK<b>C</b>TRARK</div> <div>2MPQ :G<b>A</b>CLGFGKS<b>C</b>NPSNDN<b>CCK</b>SSS<b>LAC</b>STKH-----KW<b>C</b>KYEL-</div> <div>102030</div> </div>            |                                       |           |                 |        |                                |                                                                                                                                                                                                                                                                                                                                     |                                                                                     |
| 6                                                                                                                                                                                                                                                    | 6GFT<br>(doi.org/10.1111/bph.14628)   | CyrTx-1a  | 0.58<br>(1.07Å) | 30(33) | <i>Cyriopagopus schioedtei</i> | hNav1.1 (IC <sub>50</sub> 72±10 nM);<br>hNav1.2 (IC <sub>50</sub> 75.5±4.3 nM);<br>hNav1.3 (IC <sub>50</sub> 307±15 nM);<br>hNav1.6 (IC <sub>50</sub> 115±7.5 nM);<br>hNav1.7 (IC <sub>50</sub> 130±2 nM);<br><br>hNav1.4 (IC <sub>50</sub> 7.7±0.2 µM);<br>hNav1.5 (IC <sub>50</sub> >10µM);<br>hNav1.8 (IC <sub>50</sub> >10 µM); | hCa <sub>v</sub> 1.2, 3.1, 3.2<br>hK <sub>v</sub> 7.1, 11.1<br>hK <sub>ir</sub> 2.1 |
| <div> <div>10203040</div> <div>Ms11a-3:GCKKLNSY<b>C</b>-TRNHR-<b>ECCHGLV</b>CR-RPDYGIGRGILWK<b>C</b>TRARK</div> <div>6GFT :E<b>C</b>KGF<b>G</b>KS<b>C</b>VP--GK<b>N</b>E<b>CCSGLT</b>C<b>S</b>NKH-----KW<b>C</b>KVLL-</div> <div>102030</div> </div> |                                       |           |                 |        |                                |                                                                                                                                                                                                                                                                                                                                     |                                                                                     |
| 7                                                                                                                                                                                                                                                    | 2N1N<br>(doi.org/10.1038/nature01473) | VSTx1     | 0.56<br>(1.72Å) | 33(35) | <i>Grammostola rosea</i>       | K <sub>v</sub> AP                                                                                                                                                                                                                                                                                                                   |                                                                                     |
| <div> <div>10203040</div> <div>Ms11a-3:-GCKKLNSYCTRNRHRE<b>CCHGLV</b>CRRPDYGIGRGILWK<b>C</b>TRARK-</div> <div>2N1N :SE<b>C</b>G<b>K</b>FMW<b>K</b>C<b>K</b>N-SND<b>CCKDLV</b>CSSRW-----KW<b>C</b>VL<b>A</b>SPF</div> <div>102030</div> </div>        |                                       |           |                 |        |                                |                                                                                                                                                                                                                                                                                                                                     |                                                                                     |
| 8                                                                                                                                                                                                                                                    | 1EIT<br>(doi.org/10.1021/bi952605r)   | µ-Aga-I   | 0.55<br>(1.65Å) | 33(36) | <i>Agelenopsis aperta</i>      | Voltage-gated sodium channels                                                                                                                                                                                                                                                                                                       |                                                                                     |
| <div> <div>10203040</div> <div>Ms11a-3:GCKKLNSYCTRNRH-RE<b>CCHGLV</b>CRRPDYGIGRGILWK<b>C</b>TRARK</div> <div>1EIT :E<b>C</b>VPEN<b>G</b>HCRD<b>W</b>YDE-<b>CCEGFYCS</b>CRN-----PPK<b>C</b>I<b>C</b>RNNN-</div> <div>102030</div> </div>              |                                       |           |                 |        |                                |                                                                                                                                                                                                                                                                                                                                     |                                                                                     |

|                                                                                                                                                                                                                                            |                                                                                       |         |                 |        |                             |                                                                                                                              |                        |
|--------------------------------------------------------------------------------------------------------------------------------------------------------------------------------------------------------------------------------------------|---------------------------------------------------------------------------------------|---------|-----------------|--------|-----------------------------|------------------------------------------------------------------------------------------------------------------------------|------------------------|
| 9                                                                                                                                                                                                                                          | 2M9L<br>(doi.org/10.1016/j.cub.2014.01.013;<br>doi.org/10.1016/j.toxicon.2006.09.014) | ProTx-I | 0.54<br>(1.37Å) | 31(35) | <i>Thrixopelma pruriens</i> | TRPA1 (IC <sub>50</sub> 389±77 nM);<br>Na <sub>v</sub> 1.2, Na <sub>v</sub> 1.5, Na <sub>v</sub> 1.7,<br>Na <sub>v</sub> 1.8 |                        |
| <div> <div>10203040</div> <div>Ms11a-3:GCKKLNSYCTRNHRE<b>CCHGLV</b>CR-RPDYGIGRGILWK<b>C</b>TRARK--</div> <div>2M9L :E<b>C</b>RYWLGG<b>C</b>S-AGNT<b>CCKHLV</b>CS<b>R</b>RH-----GWC<b>V</b>WDGTFS</div> <div>102030</div> </div>            |                                                                                       |         |                 |        |                             |                                                                                                                              |                        |
| 10                                                                                                                                                                                                                                         | 1LU8<br>(doi.org/10.1016/j.toxicon.2006.09.030)                                       | GsMTx-4 | 0.54<br>(1.72Å) | 32(34) | <i>Grammostola rosea</i>    | TRPC1                                                                                                                        | voltage-gated channels |
| <div> <div>10203040</div> <div>Ms11a-3:GCKKLNSYCTRN<b>HRECC</b>-HGL<b>V</b>CRRPDYGIGRGILWK<b>C</b>TRARK</div> <div>1LU8 :G<b>C</b>LEFWWK<b>C</b>NP<b>N</b>DDK<b>CCR</b>PK<b>LK</b>CSKLF-----K<b>L</b>CNFSF-</div> <div>102030</div> </div> |                                                                                       |         |                 |        |                             |                                                                                                                              |                        |
| 11                                                                                                                                                                                                                                         | 7A64<br>(doi.org/10.1021/acspts.c.1c00072)                                            | Tsp1a   | 0.53<br>(1.55Å) | 28(28) | <i>Thrixopelma sp.</i>      | hNaV1.7 (IC <sub>50</sub> 10 nM);<br>hNaV1.1 (IC <sub>50</sub> 450 nM);<br>hNaV1.2 ((IC <sub>50</sub> 250 nM)                |                        |
| <div> <div>10203040</div> <div>Ms11a-3:GCK<b>K</b>LNSYCTRNHRE<b>CCHGLV</b>CRRPDYGIGRGILWK<b>C</b>TRARK</div> <div>7A64 :Y<b>CN</b>K<b>FL</b>WT<b>C</b>D-SERP<b>CCEGLV</b>CR<b>L</b>-----W<b>C</b>KIN--</div> <div>1020</div> </div>        |                                                                                       |         |                 |        |                             |                                                                                                                              |                        |

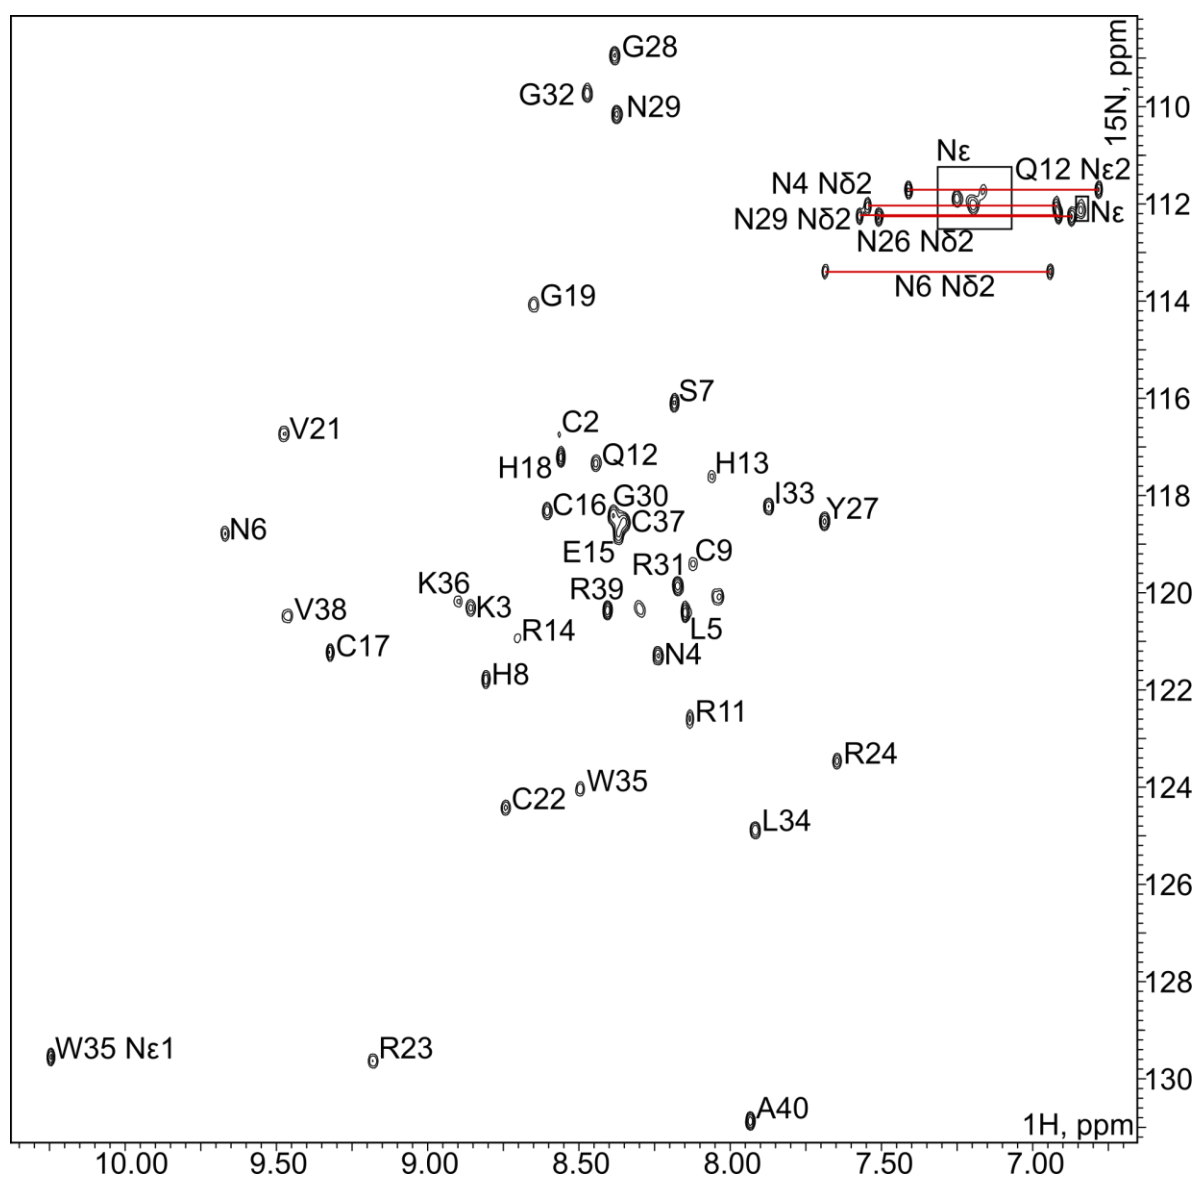

**Figure S2.**  $^1\text{H}$ - $^{15}\text{N}$ -HSQC spectrum of Ms11a-2. Spectrum was recorded at 30 °C, pH 5.2. The assignment of cross-peaks is indicated.

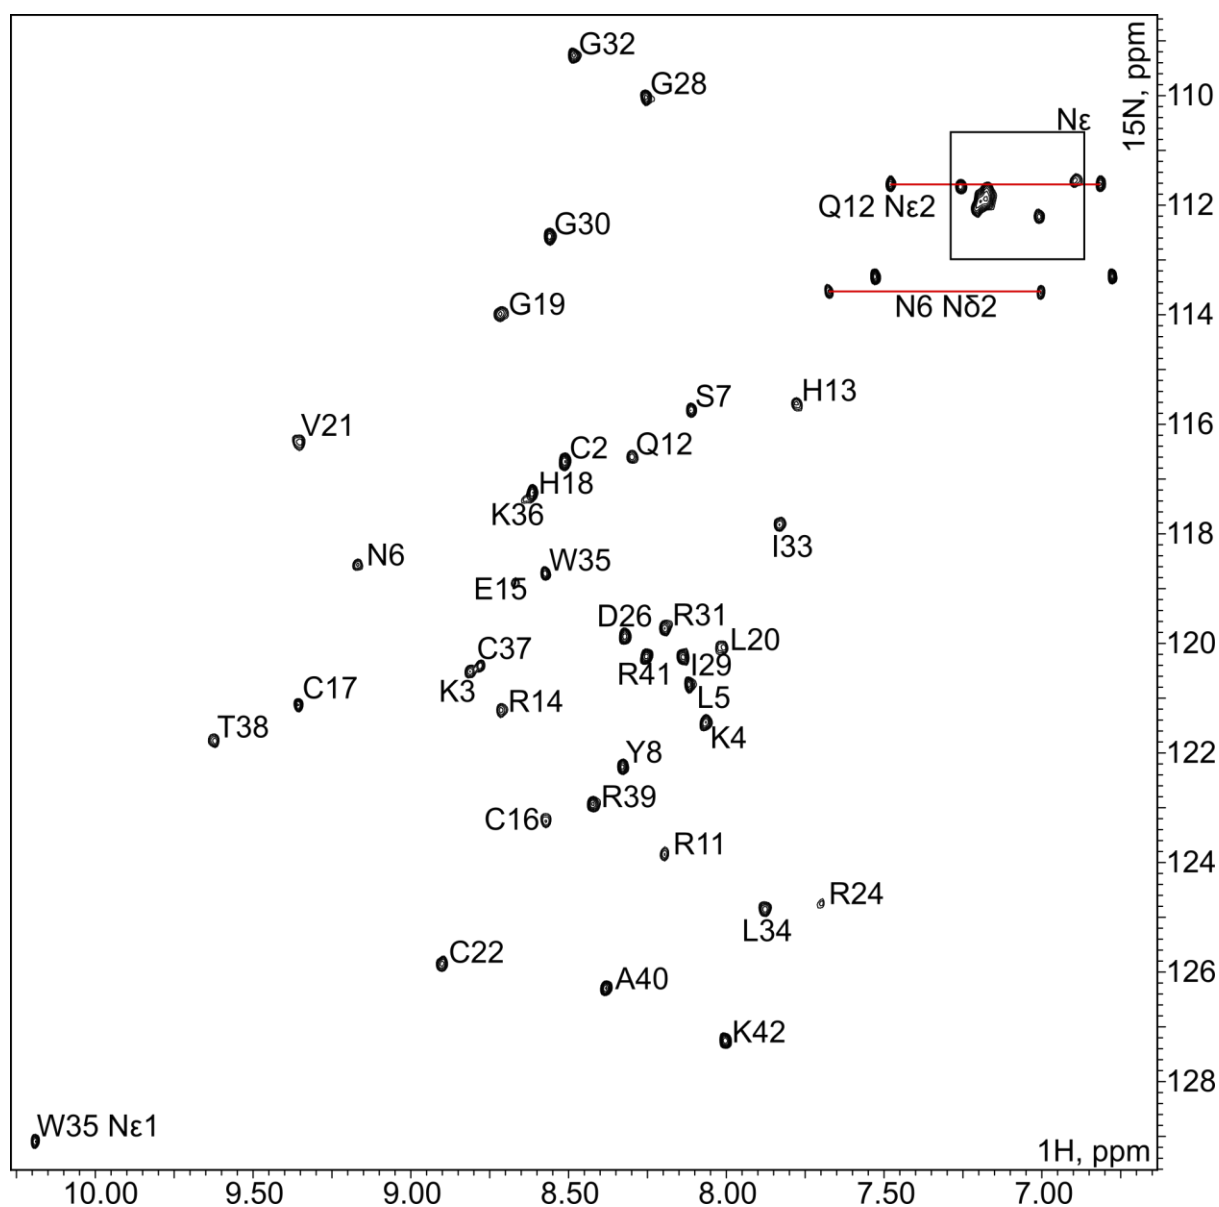

**Figure S3.**  $^1\text{H}$ - $^{15}\text{N}$ -HSQC spectrum of Ms11a-3. Spectrum was recorded at 30 °C, pH 4.5. The assignment of cross-peaks is indicated.
